# Supplementary material for: The Proteasome Inhibitor Bortezomib Induces Tongue, Pharynx and Salivary Gland Cancer Cells Death in Vitro and Delays Tumor Growth of Salivary Gland Cancer Cells Transplanted in Mice
Source: Research Square preprint supplement (doi:10.21203/rs.3.rs-561856/v1), 2021-06-01
Supplement: Supplementary file 2 [file 29967678dcac5f65703935a0.docx]

The proteasome inhibitor Bortezomib induces tongue, pharynx and salivary gland cancer cells death *in vitro* and delays tumor growth of salivary gland cancer cells transplanted in mice

Monica Benvenuto 1, 2, †, Sara Ciuffa 2, †, Chiara Focaccetti 2, 3, †, Diego Sbardella 4, Sara Fazi 5, Grazia Raffaella Tundo 2, Giovanni Barillari 2, Maria Segni 6, Vittorio Manzari 2, Andrea Modesti 2, Laura Masuelli 5, Massimo Coletta 2, ‡ and Roberto Bei 2, ‡, *

1 Saint Camillus International University of Health and Medical Sciences, via di Sant’Alessandro 8, 00131, Rome, Italy; monica.benvenuto@unicamillus.org

2 Department of Clinical Sciences and Translational Medicine, University of Rome “Tor Vergata”, via Montpellier 1, 00133, Rome, Italy; sara.ciuffa3@gmail.com (S.C.); chiara.focaccetti@uniroma5.it (C.F.); [grazia.tundo@libero.it](mailto:grazia.tundo@libero.it) (G.R.T.); [barillar@uniroma2.it](mailto:barillar@uniroma2.it) (G.B.); manzari@med.uniroma2.it (V.M.); modesti@med.uniroma2.it (A.M.); coletta@med.uniroma2.it (M.C.); bei@med.uniroma2.it (R.B.)

3  Department of Human Science and Promotion of the Quality of Life, San Raffaele University Rome, Via di Val Cannuta 247, 00166, Rome, Italy

4  IRCCS-Fondazione G.B. BIETTI, via Livenza, 3, 00189, Rome, Italy; [diego.sbardella@fondazionebietti.it](mailto:diego.sbardella@fondazionebietti.it)

5  Department of Experimental Medicine, University of Rome “Sapienza”, viale Regina Elena 324, 00161, Rome, Italy; sara.fazi@uniroma1.it (S.F.); laura.masuelli@uniroma1.it (L.M.)

6 Department of Maternal Infantile and Urological Sciences, Sapienza University of Rome, 00161 Rome, Italy. Pediatric Endocrinology Unit, Policlinico Umberto I, Viale Regina Elena 364 -00161- Rome Italy, maria.segni@uniroma1.it

* Correspondence: bei@med.uniroma2.it; Tel.: +39-0672596522

† These authors contributed equally to this work

**‡** These last authors contributed equally to this work

**SUPPLEMETARY INFORMATIONS**


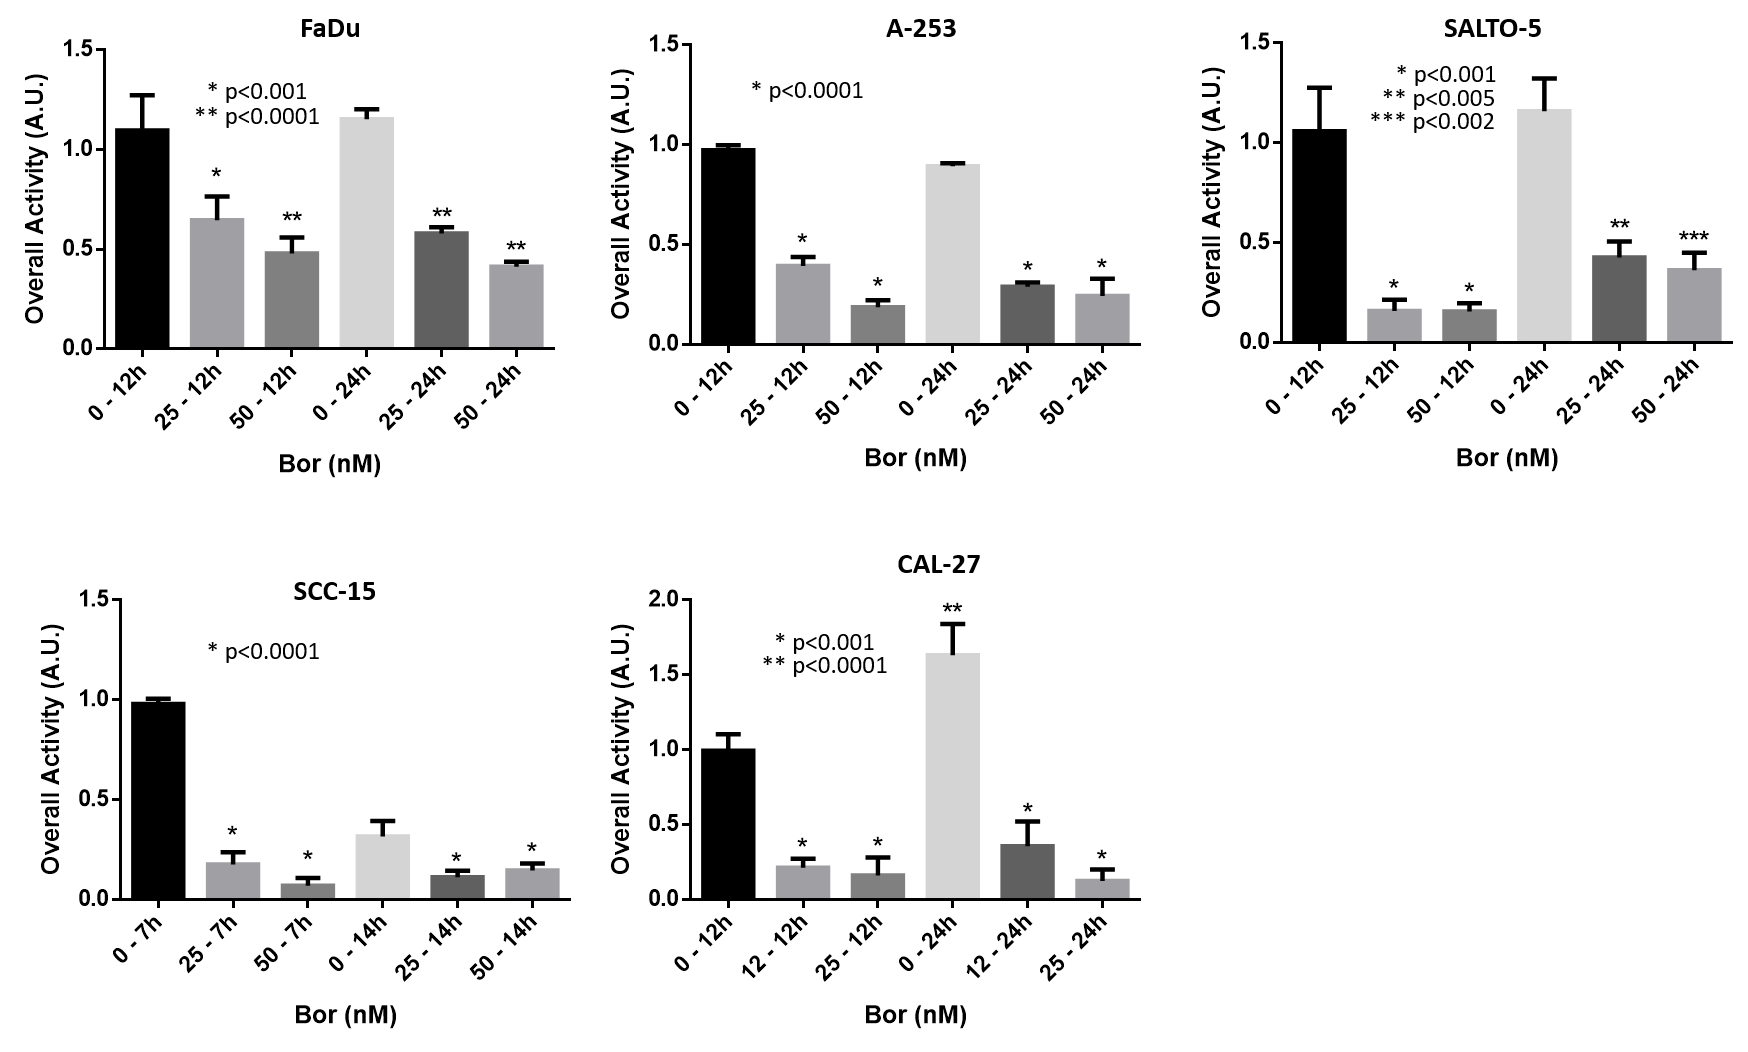


**Figure S1:** Semi-quantitative analysis of proteasome proteolytic activity.

Proteasome activity of particles shown in Figure 6A, was determined by calculating the overall light intensity of all proteasome assemblies along the lane. A nominal value of 1 was assigned to the intensity of the untreated cell harvested at the earliest time-point; A representative panel of a single experiment is shown. Every assay has been carried out three independent times. Data are presented as mean±SD (n=3). One-way ANOVA followed by Tukey’s post-hoc significance test. The statistical analysis reported refers to the ratio between each Bortezomib-related experimental condition *vs* untreated cells at the same time-point.


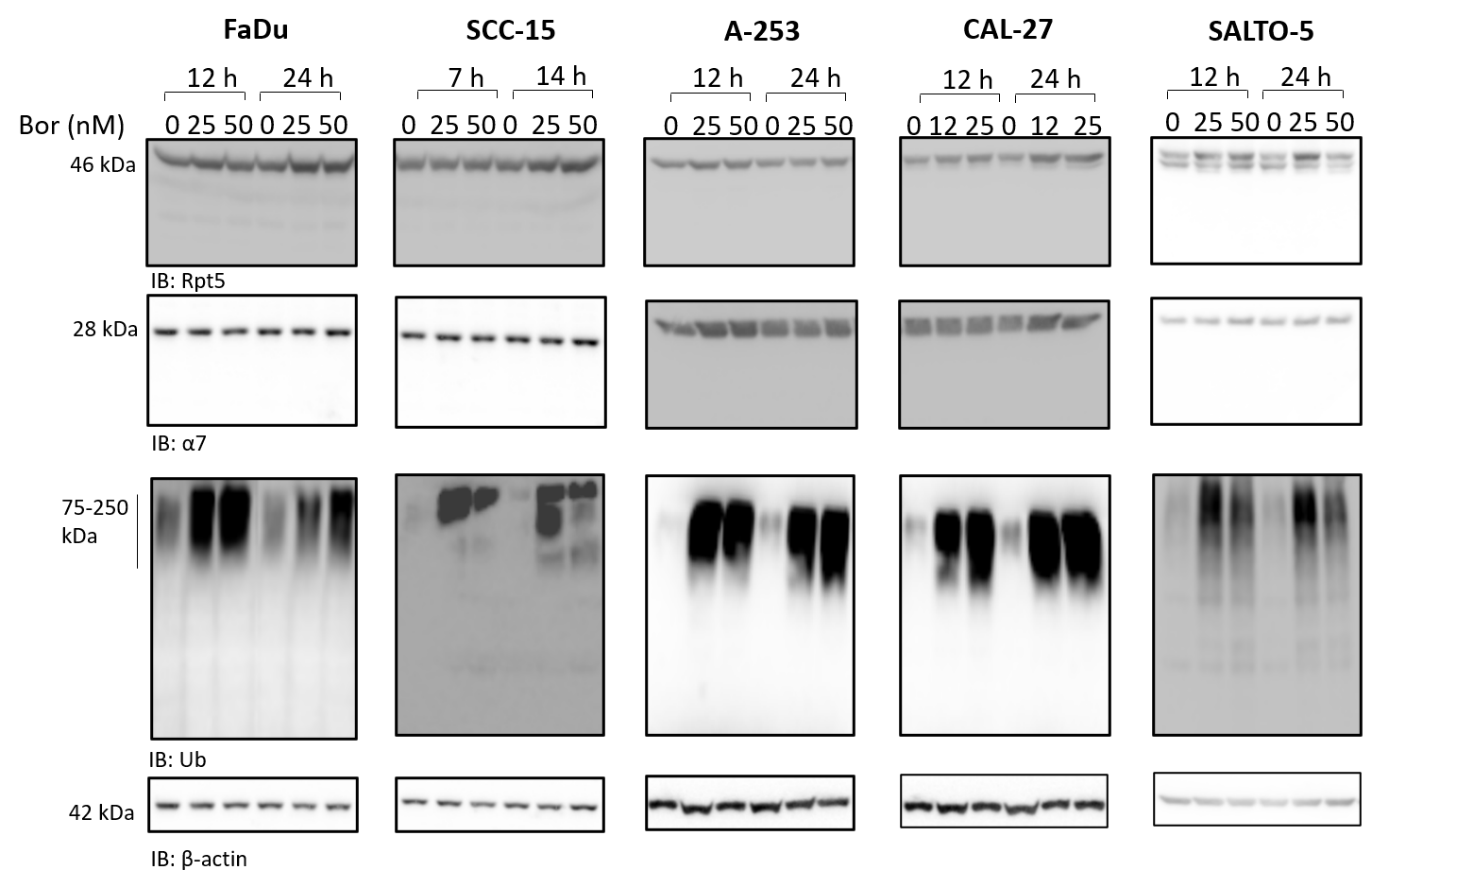


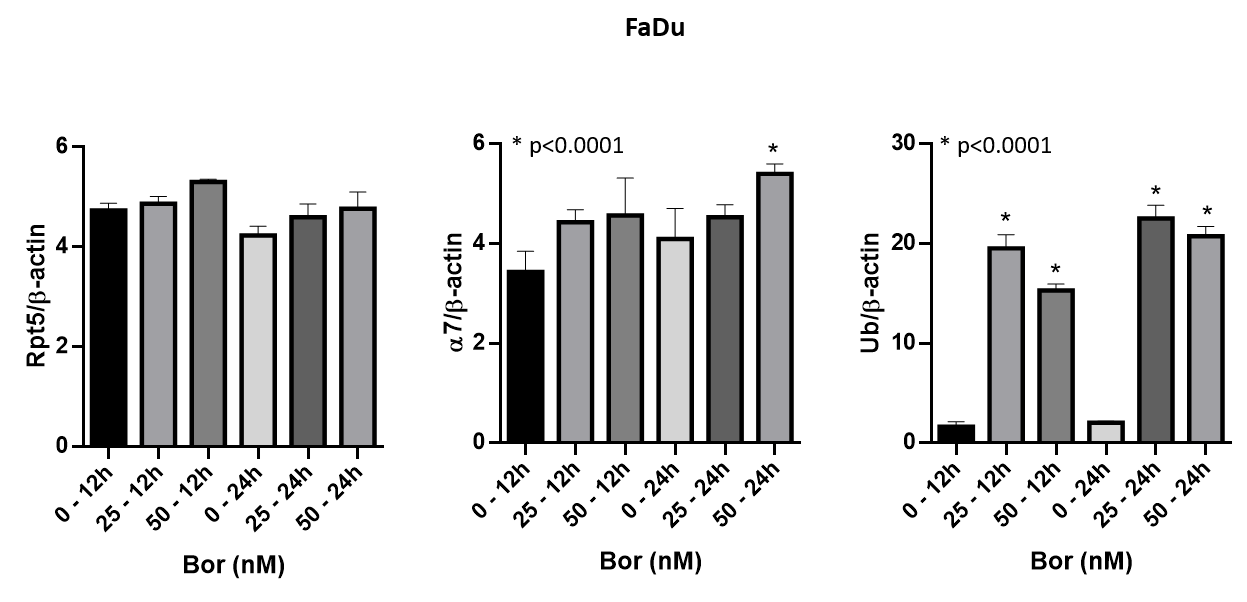


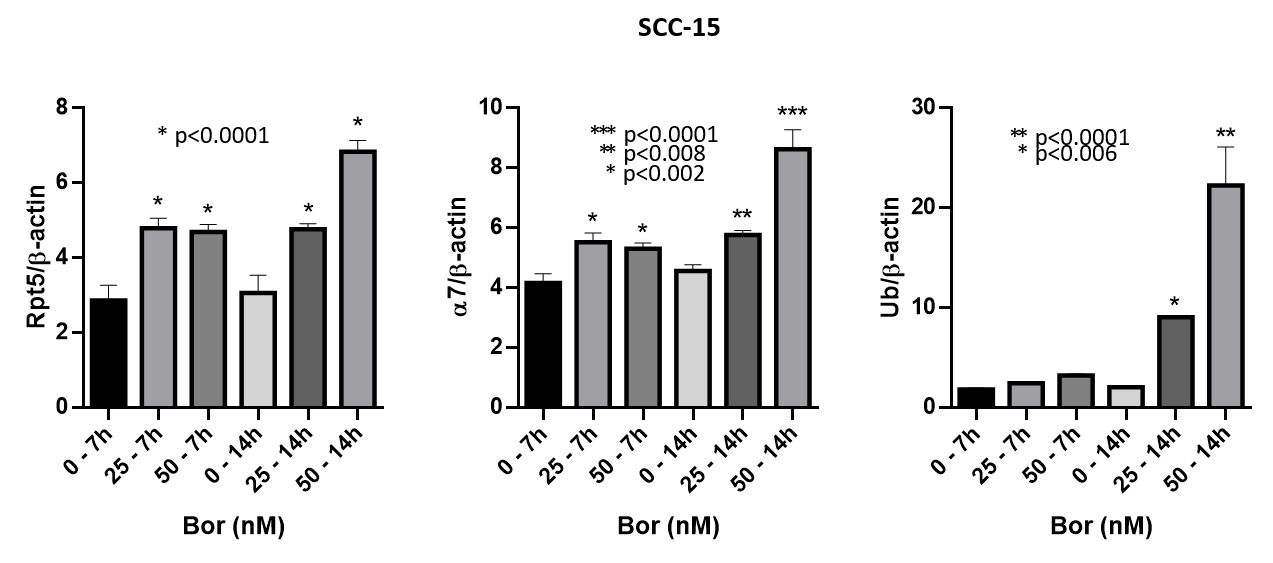


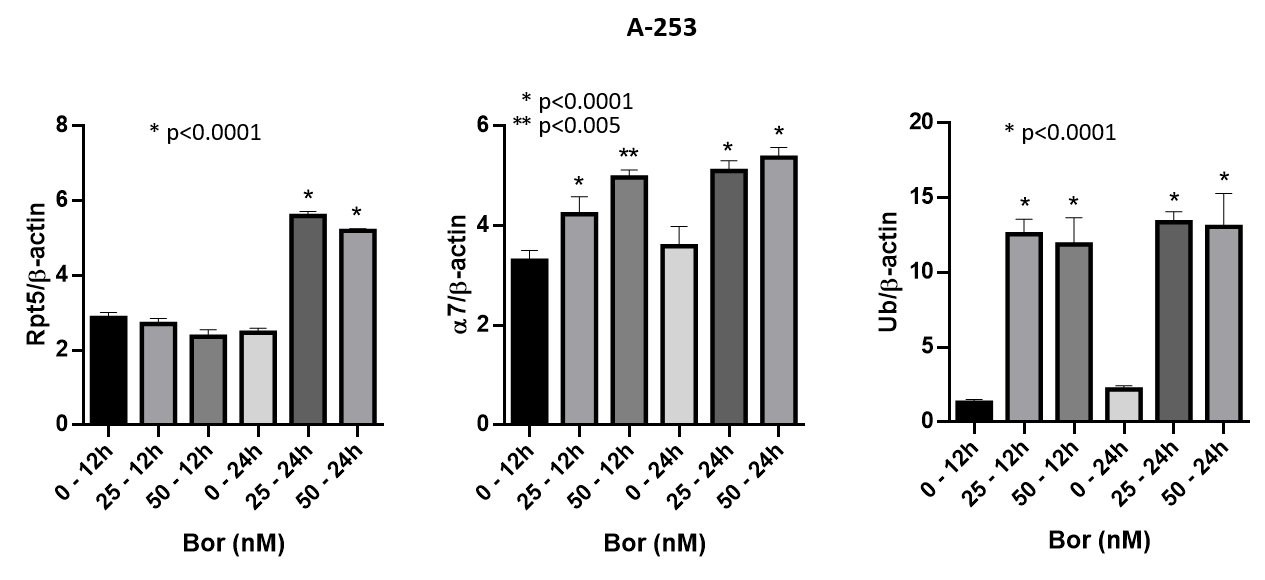


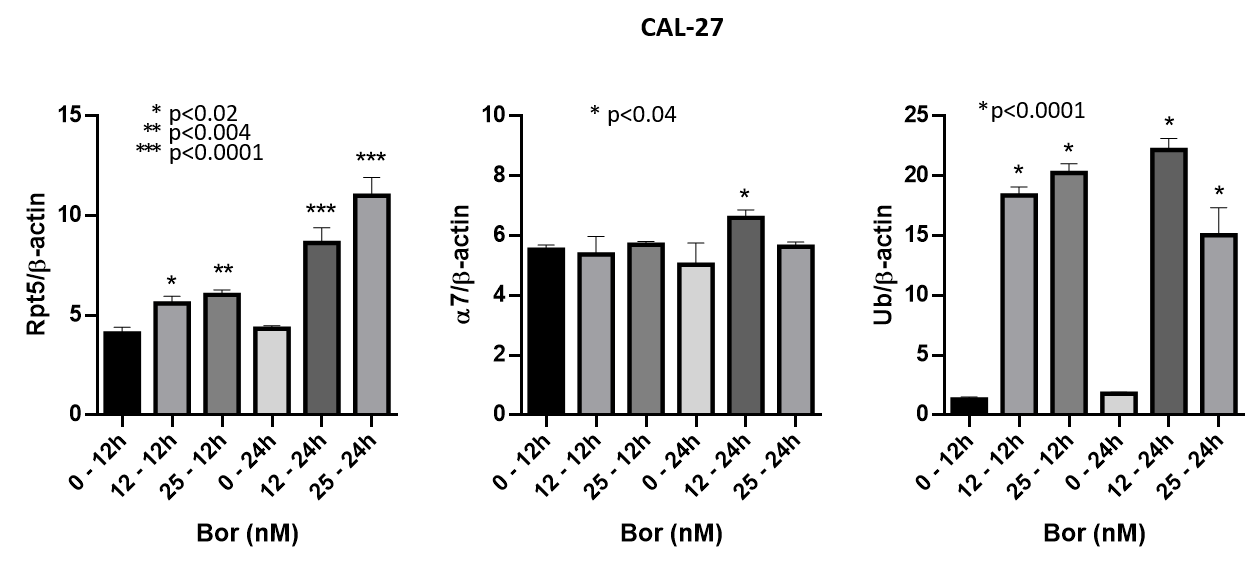


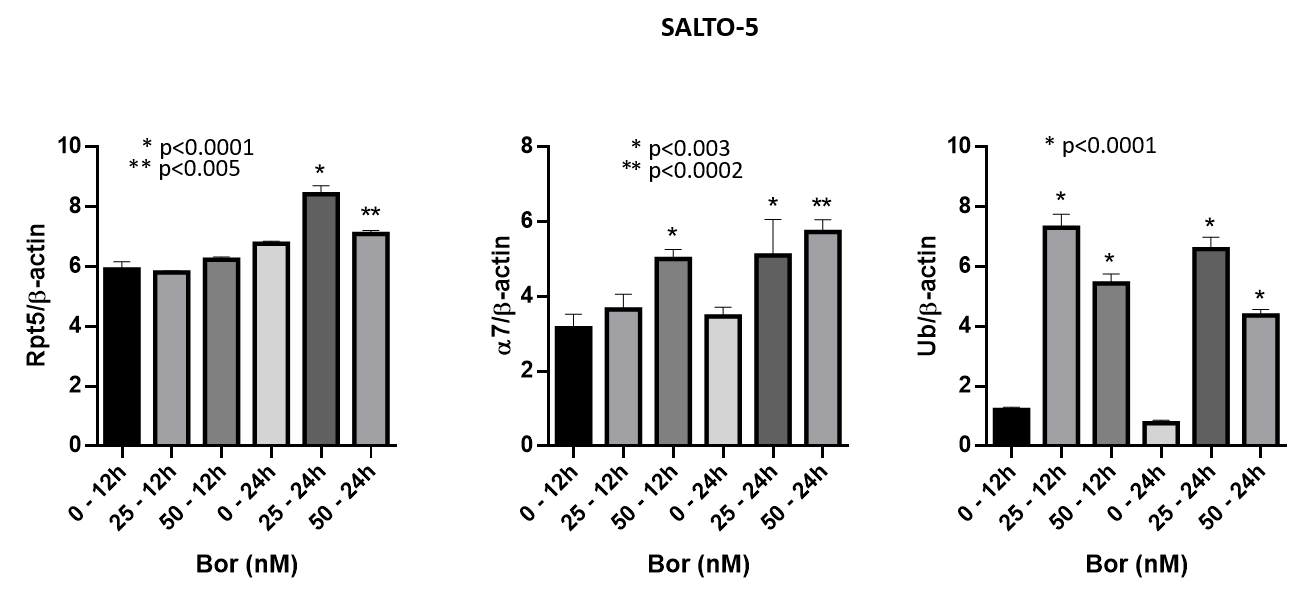


**Figure S2**: Semiquantitative analysis of selected proteasome subunits and of poly-ubiquitinated proteins.

Cytosolic extracts of cell lines were analysed for free α7, Rpt5 and poly-ubiquitinated proteins by denaturing and reducing Western Blotting. β-actin was used as internal control. A representative panel of a single experiment is shown. Every assay has been carried out three independent times. Densitometric analysis of immunoblotting data are presented as mean±SD (n=3). One-way ANOVA followed by Tukey’s post-hoc significance test. The statistical analysis reported refers to the ratio between each Bortezomib-related experimental condition *vs* untreated cells at the same time-point. Uncropped western blots are reported in Supplementary Fig. S4.

**
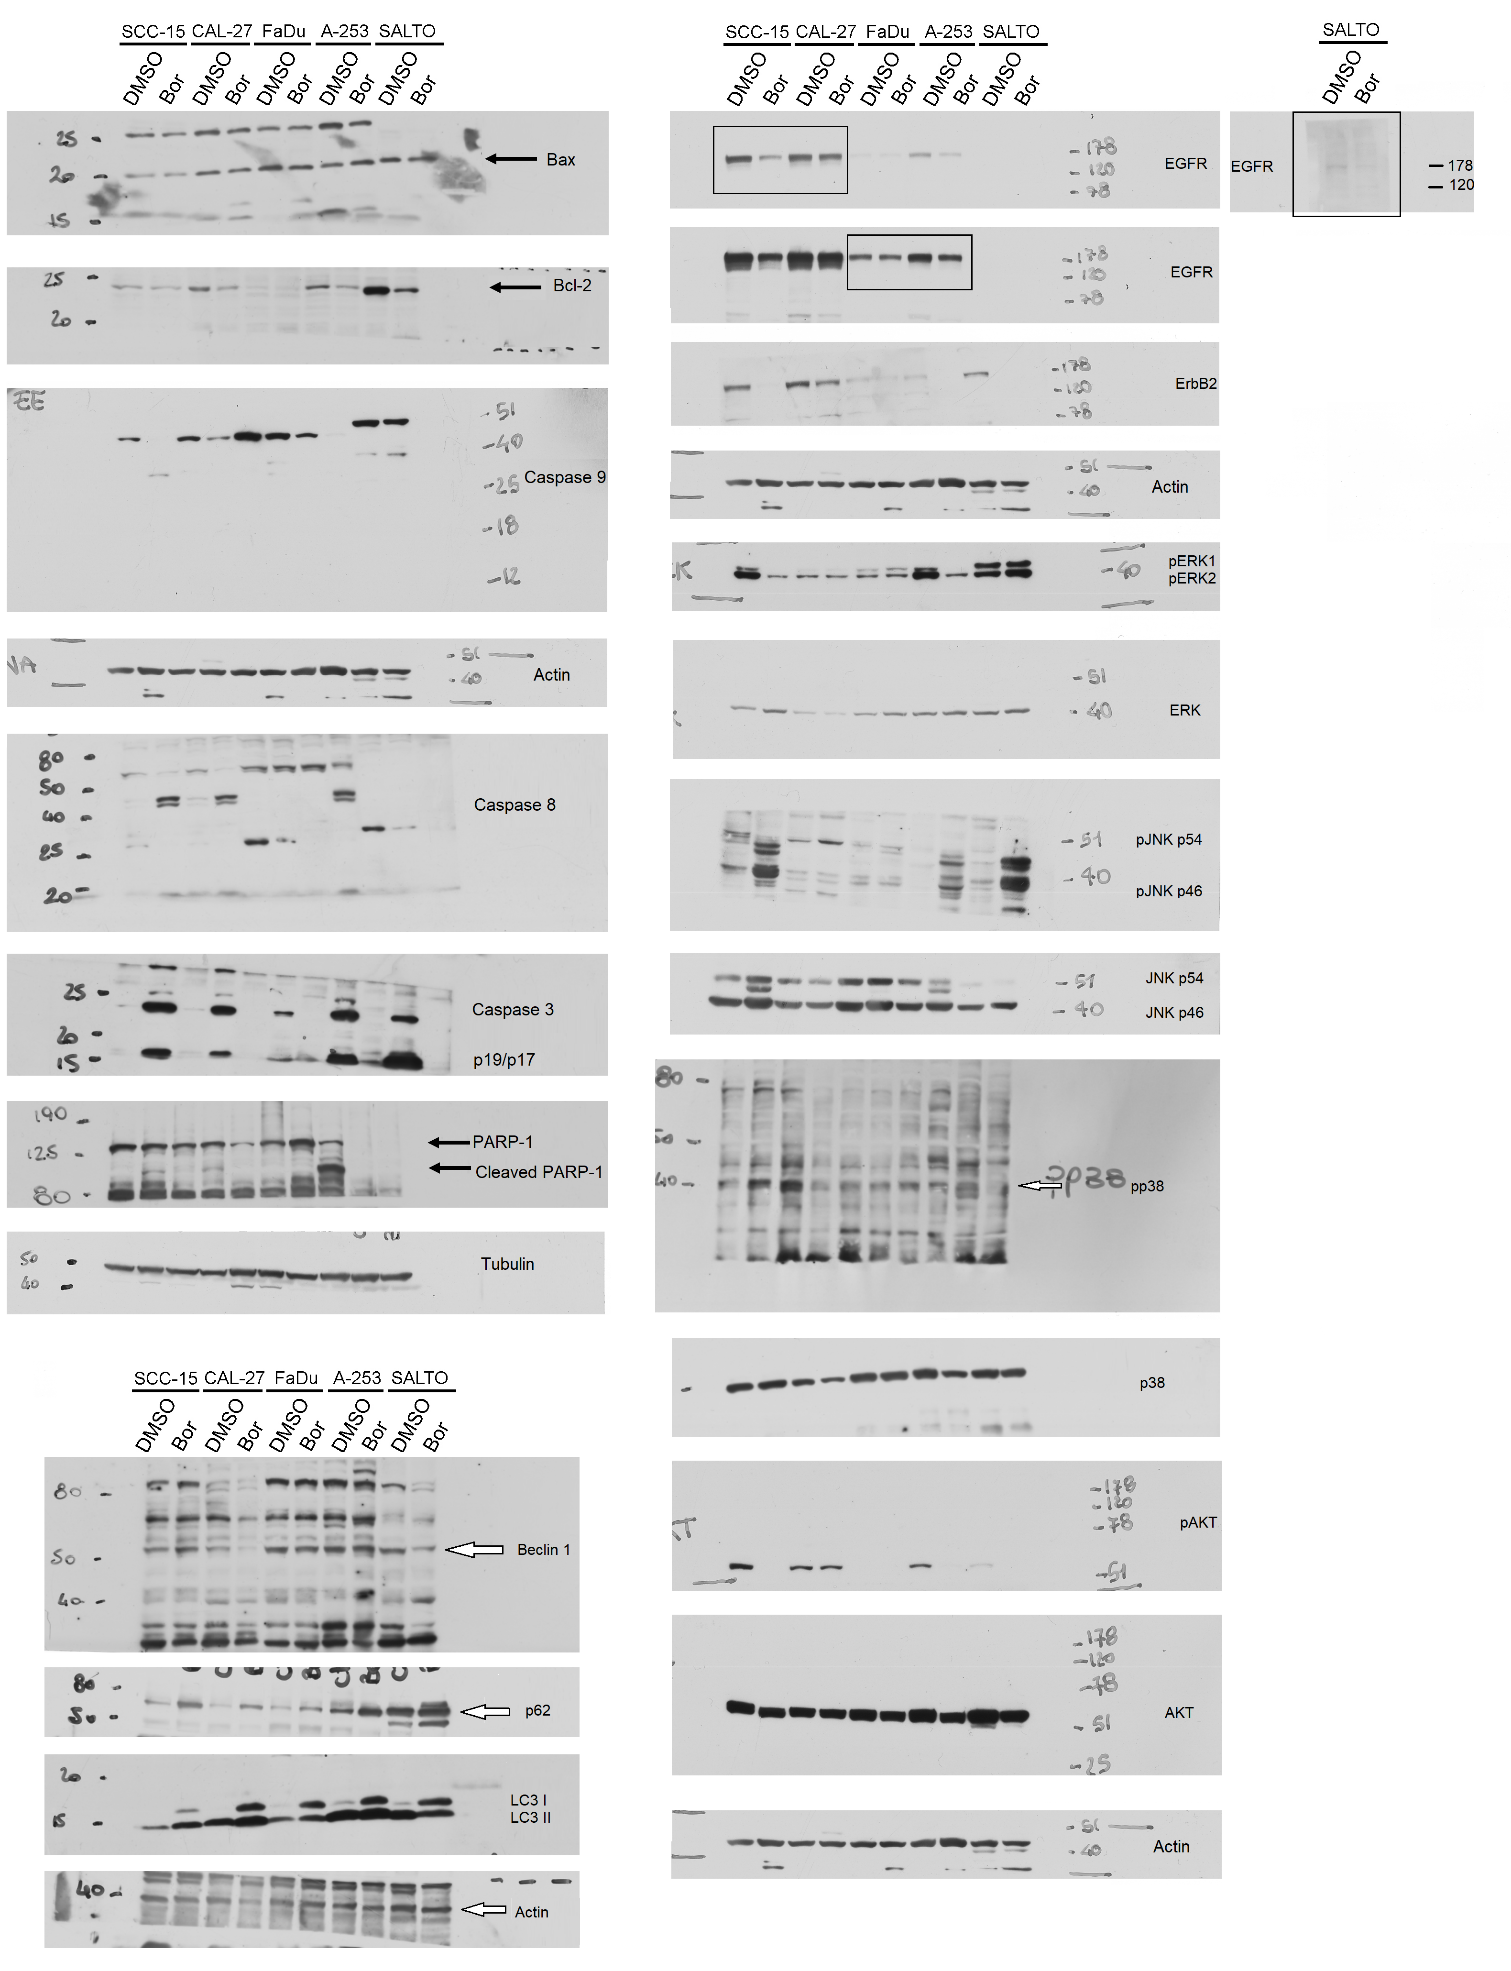
**

**Figure S3:** Uncropped Western blots corresponding to Figures 3, 4, 5. Note that the membranes were cut before probing.


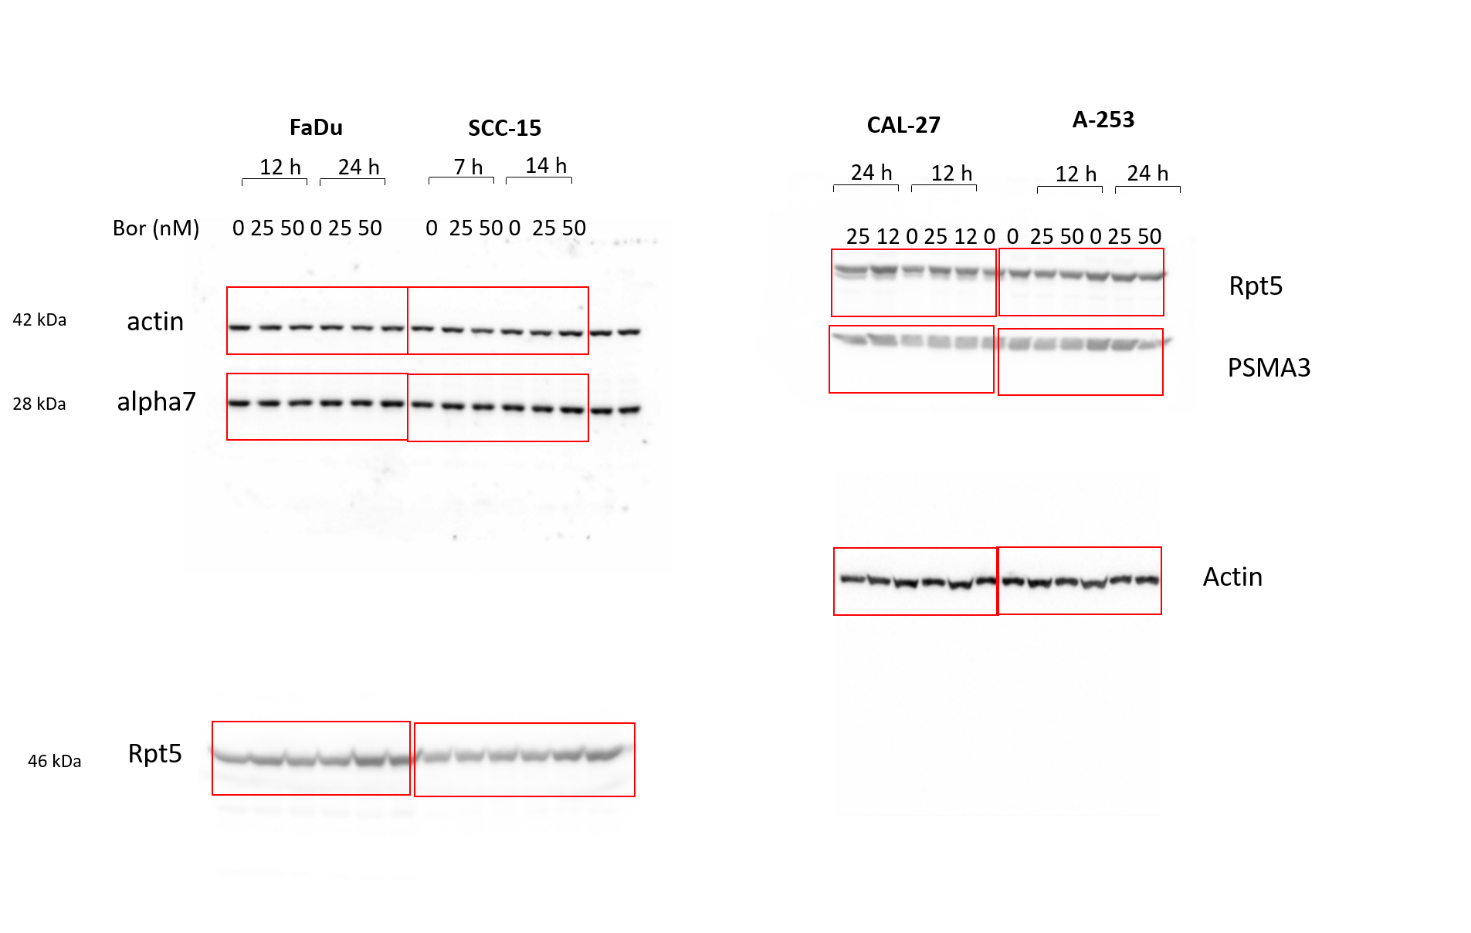


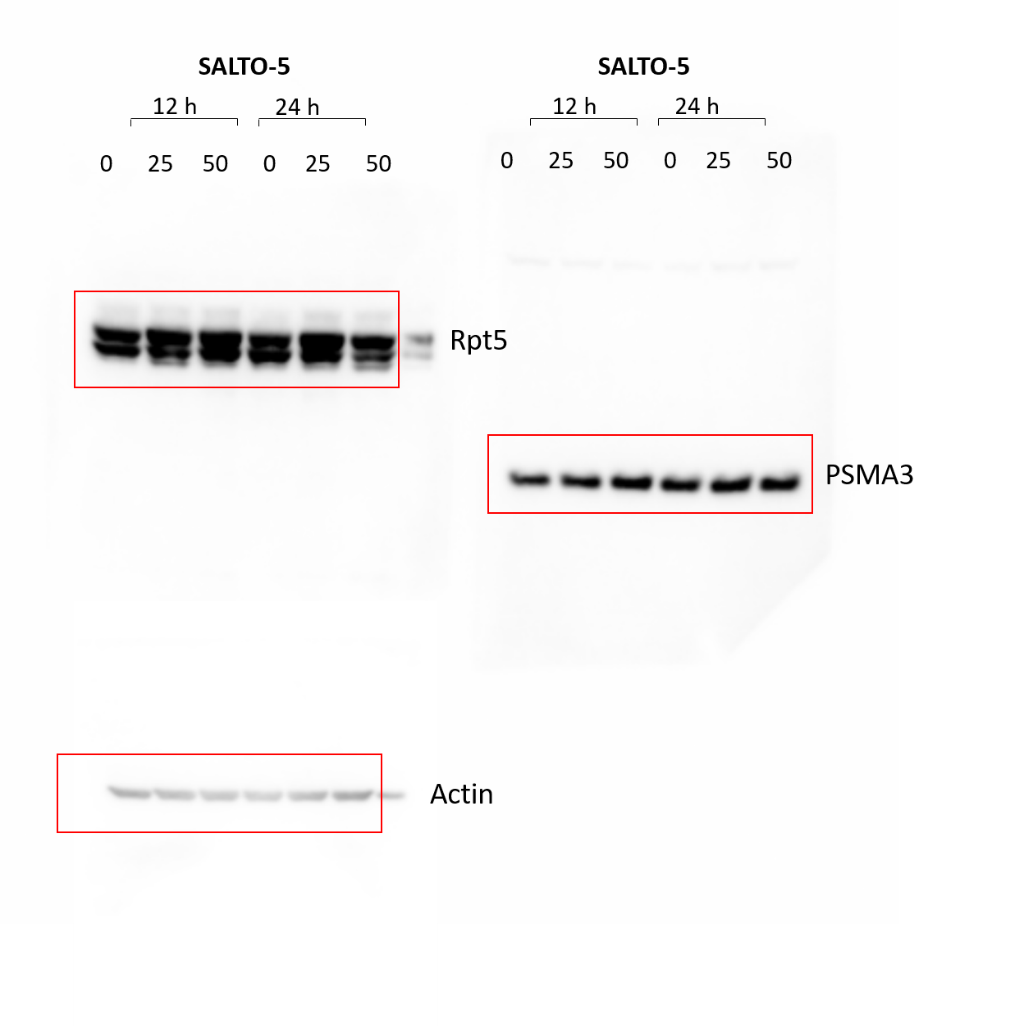


**Figure S4:** Uncropped Western blots corresponding to proteasome subunits expression in Supplementary Fig. S2.
